# Supplementary material for: Healthy dietary patterns and risk of cardiovascular disease in diabetic patients: a prospective cohort study
Source: Royal Society of Chemistry journal article supplement (doi:10.1039/d3fo01541f), 2023-01-01
Supplement: d3fo01541f1.pdf [file d3fo01541f1.pdf]

## Supplementary Material

|                                                                                                                               |    |
|-------------------------------------------------------------------------------------------------------------------------------|----|
| <b>Figure S1.</b> Flow chart of study participants for analysis.....                                                          | 2  |
| <b>Figure S2.</b> Association of AMED, DASH diet score and the risk of CVD stratified by potential risk factors. ....         | 3  |
| <b>Table S1.</b> Diet component definitions used in the healthy diet score .....                                              | 4  |
| <b>Table S2.</b> Diet component definitions used in the AMED score .....                                                      | 5  |
| <b>Table S3.</b> Diet component definitions used in the DASH diet score .....                                                 | 6  |
| <b>Table S4.</b> Codes used in the UK Biobank to identify dementia cases and relevant diseases.....                           | 7  |
| <b>Table S5.</b> Basic characteristics of diabetes participants by AMED and DASH diet score in the UK Biobank cohort .....    | 8  |
| <b>Table S6.</b> Multivariable Hazard Ratios (95% CIs) of healthy diet score and stroke subgroup.....                         | 11 |
| <b>Table S7.</b> Multivariable Hazard Ratios (95% CIs) of healthy diet score and CVD incidence from sensitivity analyses..... | 12 |
| <b>Table S8.</b> Multivariable Hazard Ratios (95% CIs) of AMED diet score and CVD incidence from sensitivity analyses.....    | 14 |
| <b>Table S9.</b> Multivariable Hazard Ratios (95% CIs) of DASH diet score and CVD incidence from sensitivity analyses.....    | 15 |

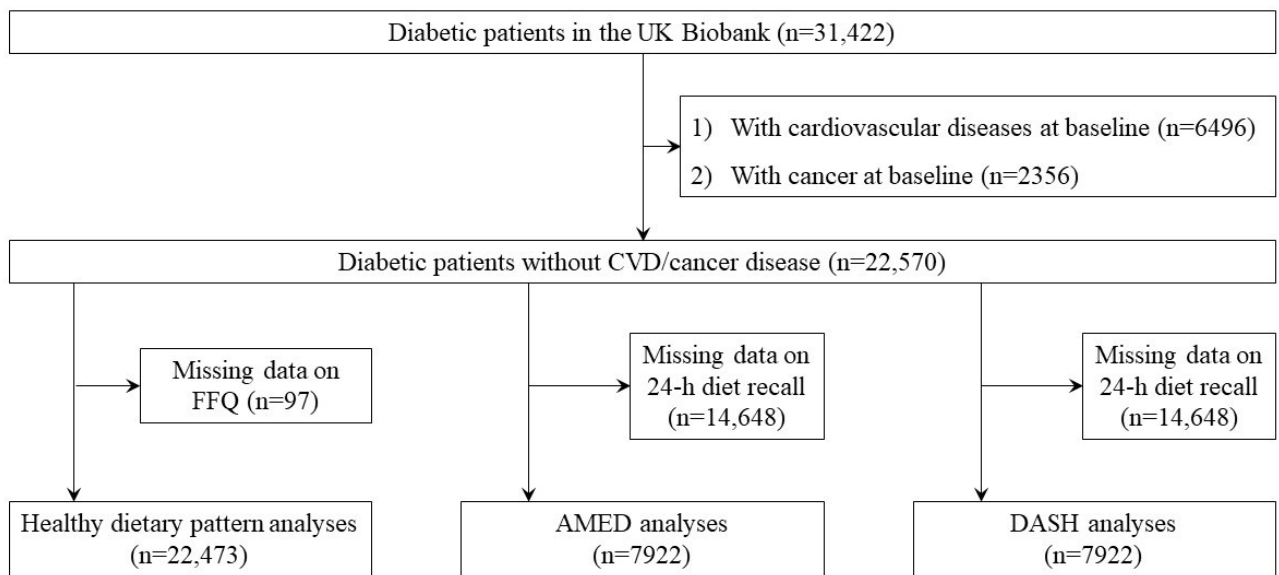

**Figure S1. Flow chart of study participants for analysis**

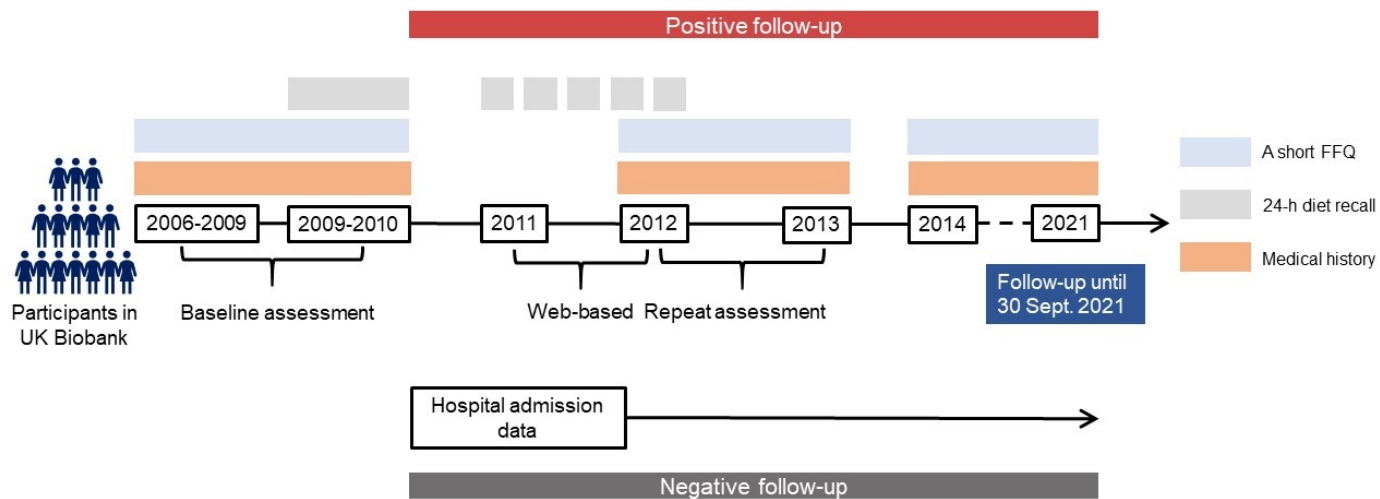

**Figure S2. Study design.** FFQ=food frequency questionnaire.

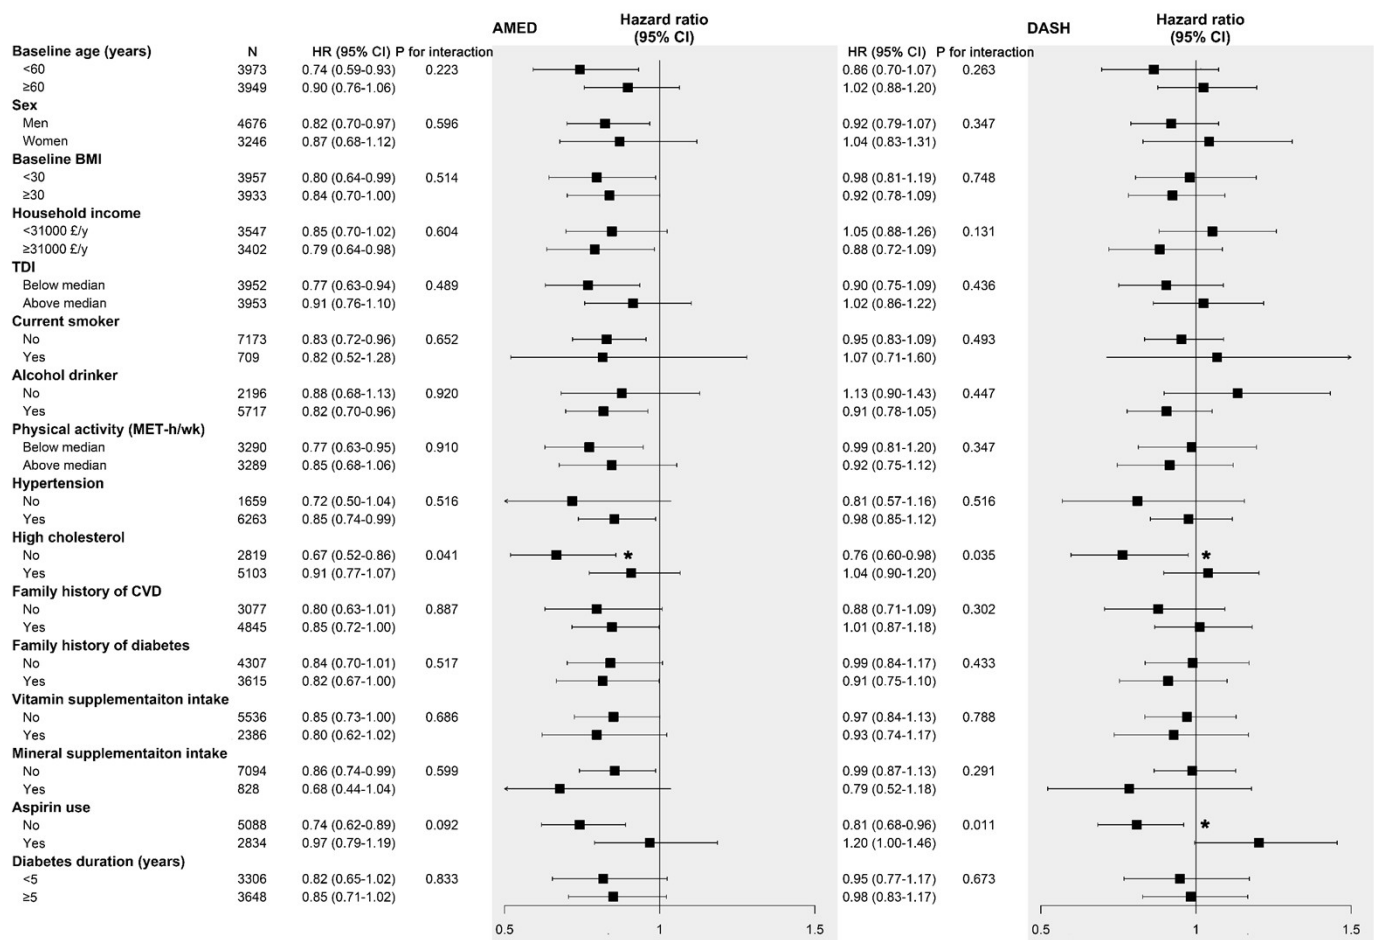

**Figure S3. Association of AMED, DASH diet score and the risk of CVD stratified by potential risk factors.** BMI = body mass index; MET = metabolic equivalent of task; AMED = Alternate Mediterranean Diet; DASH = the Dietary Approaches to Stop Hypertension. Forest plots show the multivariable HRs of CVD associated with AMED and DASH diet scores in subgroups. HRs were adjusted for age, sex, race, centers, BMI, household income, Townsend deprivation index, smoking, alcohol consumption, physical activity, history of hypertension, history of high cholesterol, family history of cardiovascular disease, family history of diabetes, vitamin supplement use, mineral supplement use, aspirin use, and diabetes duration. Horizontal lines represent 95% CIs. \*P for interaction<0.05.

**Table S1.** Diet component definitions used in the healthy diet score

| Components                | Criteria for minimum score of 0 | Criteria for maximum score of 10 | Field IDs                                                                                                                                                                                                       | Amount per serving                                                                |
|---------------------------|---------------------------------|----------------------------------|-----------------------------------------------------------------------------------------------------------------------------------------------------------------------------------------------------------------|-----------------------------------------------------------------------------------|
| Fruit                     | 0 servings/day                  | ≥3 servings/day                  | 1309 (pieces fresh fruit/day)<br>1319 (pieces dried fruit/day)                                                                                                                                                  | 1309 – 1 piece<br>1319 – 5 pieces                                                 |
| Vegetable                 | 0 servings/day                  | ≥3 servings/day                  | 1289 (tablespoons cooked vegetables/day)<br>1299 (salad/raw vegetables/day)                                                                                                                                     | 3 heaped tablespoons                                                              |
| Whole grains              | 0 servings/day                  | ≥3 servings/day                  | 1438, 1448 (wholemeal/wholegrain bread slices/week)<br>1458, 1468 (bran/oat/muesli cereal bowls/week)                                                                                                           | 1438/1448 – 1 slice/day<br>1458/1468 – 1 bowl/day                                 |
| Fish                      | 0 servings/week                 | ≥2 servings/week                 | 1329 (oily fish/week)<br>1339 (non-oily fish/week)                                                                                                                                                              | Once/week                                                                         |
| Dairy                     | 0 servings/day                  | ≥2 servings/day                  | 1408 (cheese/week)<br>1418 (milk type)                                                                                                                                                                          | 1408 – 1 piece/day<br>1418 – 1 glass/day if consumption of any type of milk       |
| Vegetable oils            | 0 servings/day                  | ≥2 servings/day                  | 1428 (Flora Pro-Active/Benecol spread)<br>2654 (Flora Pro-Active/Benecol, soft margarine -, olive oil based -, polyunsaturated/sunflower oil-based -, other low/reduced fat spread)<br>1438 (bread slices/week) | 1 serving/day if in combination with eating at least 2 slices of bread (ID 1438)  |
| Refined grains            | >2 servings/day                 | 0 servings/day                   | 1438, 1448 (white, brown, other bread slices/week) 1458, 1468 (biscuit, other cereals/week)                                                                                                                     | 1438/1448 – 1 slice/day 1458/1468 – 1 bowl/day                                    |
| Processed meats           | >1 serving/week                 | 0 serving/week                   | 1349 (processed meat/week or daily) 3680 (age when last ate meat)                                                                                                                                               | 1349 – 1 piece/day<br>3680 – 0 pieces/day if indicated having never eaten meat    |
| Unprocessed meats         | >2 servings/week                | 0 serving/week                   | 1359 (poultry/week or day) 1369 (beef/week or day)<br>1379 (lamb or mutton/week or day) 1389 (pork/week or day)<br>3680 (age when last ate meat)                                                                | 1359-1389 – once/week<br>3680 – 0 pieces/day if indicated having never eaten meat |
| Sugar-sweetened beverages | Drink                           | Don't drink                      | 6144 (never consumes drinks containing sugar)                                                                                                                                                                   | 0 servings                                                                        |
| Total score               | 0                               | 100                              | □                                                                                                                                                                                                               | □                                                                                 |

**Table S2.** Diet component definitions used in the AMED score

| Components                                | Criteria for minimum score of 0 | Criteria for maximum score of 1 | Field IDs                                                                                                                                                        |
|-------------------------------------------|---------------------------------|---------------------------------|------------------------------------------------------------------------------------------------------------------------------------------------------------------|
| Fruit                                     | Less than median intake         | Greater than median intake      | 100190,100200 (Fruit juice)<br>1004410-104590 (Whole fruit and dried fruit)                                                                                      |
| Vegetable                                 | Less than median intake         | Greater than median intake      | 104060-104380 (All vegetables except potatoes and beans)<br>104000, 104010, 104110, 104120, 104280 (Beans)                                                       |
| Legumes                                   | Less than median intake         | Greater than median intake      | 103270 (Tofu)<br>104000, 104010, 104110, 104120, 104280 (Beans)                                                                                                  |
| Whole grains                              | Less than median intake         | Greater than median intake      | 100770, 100830, 100840, 100850, 102720, 102740, 102780 (Cereal)<br>100810, 101260 (Oat)<br>100950, 101020, 101090, 101160 (Bread)<br>20091-20094 (Type of bread) |
| Nuts                                      | Less than median intake         | Greater than median intake      | 102410-102450 (Peanut, nuts, seeds)                                                                                                                              |
| Fish                                      | Less than median intake         | Greater than median intake      | 103150-103230 (Fish and seafood)                                                                                                                                 |
| Red and processed meats                   | Greater than median intake      | Less than median intake         | 103010 (Sausage), 103070 (Bacon), 103080 (Ham)                                                                                                                   |
| Ratio of monounsaturated to saturated fat | Less than median intake         | Greater than median intake      | 100004 (Fat), 100007 (Polyunsaturated fat), 100006 (Saturated fat)                                                                                               |
| Ethanol                                   | <5 or >25 g                     | 5–25 g/d                        | 100022 (Alcohol)                                                                                                                                                 |
| Total score                               | 0                               | 9                               | □                                                                                                                                                                |

AMED=Alternate Mediterranean Diet.

**Table S3.** Diet component definitions used in the DASH diet score

| <b>Components</b>           | <b>Criteria for minimum score of 1</b> | <b>Criteria for maximum score of 5</b> | <b>Field IDs</b>                                                                                                                        |
|-----------------------------|----------------------------------------|----------------------------------------|-----------------------------------------------------------------------------------------------------------------------------------------|
| Total fruit                 | First quintile                         | Fifth quintile                         | 100190-100200 (Fruit juice)<br>104410-104590 (Whole fruit and dried fruit)                                                              |
| Vegetables without potatoes | First quintile                         | Fifth quintile                         | 104060-104100, 104130-104380 (Vegetables)<br>102490 (Olives)<br>100770, 100830, 100840, 100850, 102720, 102740, 102770, 102780 (Cereal) |
| Whole grains                | First quintile                         | Fifth quintile                         | 100810, 101260 (Oat)<br>100950, 101020, 101090, 101160 (Bread)<br>20091-20094 (Type of bread)                                           |
| Low-fat dairy products      | First quintile                         | Fifth quintile                         | 100015, 100520 (Milk)<br>102810, 102850, 102879 (Cheese)<br>20106, 102090 (Yogurt)                                                      |
| Nuts, seeds, and legumes    | First quintile                         | Fifth quintile                         | 102410-102440 (Nuts)<br>102450 (Seeds)<br>103270 (Tofu), 104000, 104010, 104110, 104120, 104280 (Legumes)                               |
| Red and processed meat      | Fifth quintile                         | First quintile                         | 103020-103040 (Red meat)<br>103010, 103070, 103080 (Processed meat)                                                                     |
| Sugar-sweetened beverages   | Fifth quintile                         | First quintile                         | 100170, 100180                                                                                                                          |
| Sodium                      | Fifth quintile                         | First quintile                         | 26052                                                                                                                                   |
| <b>Total score</b>          | 8                                      | 40                                     | □                                                                                                                                       |

DASH=Dietary Approaches to Stop Hypertension.

**Table S4.** Codes used in the UK Biobank to identify dementia cases and relevant diseases

| <b>Outcomes</b>              | <b>□</b>                     | <b>ICD-9</b>                                | <b>ICD-10</b>           | <b>OPCS-4</b>               | <b>Self-reported fields</b>                      | <b>Other</b>                                                 |
|------------------------------|------------------------------|---------------------------------------------|-------------------------|-----------------------------|--------------------------------------------------|--------------------------------------------------------------|
| Cardiovascular disease (CVD) | Coronary Heart Disease (CHD) | 410, 411, 412, 413, 414                     | I20-25                  | K40-K46, K49, K50, K75      | 6150 (1), 3894, 20004 (1070,1095,1523)           |                                                              |
|                              | Atrial Fibrillation (AF)     | 4273                                        | I48                     | K621, K622, K623            | 20002 (1471, 1483)                               |                                                              |
|                              | Stroke                       | 430, 431, 434, 4340, 4341, 4349, 436        | I60, I61, I62, I63, I64 | A052-A054, L351, L353, L343 | 6150 (3), 4056, 20002 (1081,1491, 1583, 1086)    |                                                              |
| Diabetes                     | Type 2 Diabetes              | 250.00, 250.10, 250.20, 250.90              | E11                     | —                           | 20002 (1223)                                     |                                                              |
|                              | Type 1 Diabetes              | 250.01, 250.11, 250.21, 250.91              | E10                     | —                           | 20002 (1222)                                     |                                                              |
|                              | Unclarified                  | 250.09, 250.19, 250.29, 250.3-250.7, 250.99 | E12-14                  | —                           | 2443 (1), 2976, 6153 (3), 6177 (3), 20002 (1220) | Randomized glucose >11.1 mmol/L or HbA1c ≥6.5% (48 mmol/mol) |



**Table S5.** Basic characteristics of diabetes participants by AMED and DASH diet score in the UK Biobank cohort

| Characteristics                             | Tertiles of Mediterranean diet score |            |            | P value | □<br>□ | Tertiles of DASH diet score |            |            | P value |
|---------------------------------------------|--------------------------------------|------------|------------|---------|--------|-----------------------------|------------|------------|---------|
|                                             | T1                                   | T2         | T3         |         |        | T1                          | T2         | T3         |         |
| N                                           | 1841                                 | 3366       | 2715       |         |        | 2684                        | 2562       | 2676       |         |
| Male (%)                                    | 62.9                                 | 59.8       | 55.4       | <0.001  |        | 67.6                        | 58.7       | 50.7       | <0.001  |
| race (%)                                    |                                      |            |            | 0.005   |        |                             |            |            | <0.001  |
| White                                       | 90.7                                 | 89.4       | 87.2       |         |        | 90.8                        | 88.8       | 87.1       |         |
| Non-white                                   | 8.9                                  | 10.1       | 12.2       |         |        | 8.8                         | 10.4       | 12.4       |         |
| Age (yr)                                    | 57.1±7.7                             | 57.9±7.5   | 58.7±7.2   | <0.001  |        | 57.0±7.7                    | 58.2±7.4   | 58.8±7.2   | <0.001  |
| BMI (kg/m <sup>2</sup> )                    | 32.0±6.1                             | 31.1±6.0   | 29.9±5.7   | <0.001  |        | 32.0±6.0                    | 30.7±5.9   | 30.0±5.9   | <0.001  |
| Physical activity (MET-h/wk)                | 32.8±40.8                            | 35.3±39.5  | 39.2±39.7  | <0.001  |        | 31.4±37.1                   | 37.0±42.1  | 39.9±40.0  | <0.001  |
| SBP (mmHg)                                  | 143.3±17.9                           | 143.6±18.1 | 143.8±18.1 | 0.733   |        | 143.6±17.8                  | 143.5±17.9 | 143.7±18.4 | 0.942   |
| DBP (mmHg)                                  | 83.4±10.3                            | 82.9±10.0  | 82.3±10.4  | 0.001   |        | 83.6±10.0                   | 82.8±10.0  | 82.0±10.6  | <0.001  |
| Blood glucose (mmol/L)                      | 7.7±3.6                              | 7.5±3.3    | 7.4±3.3    | 0.015   |        | 7.7±3.6                     | 7.5±3.3    | 7.3±3.2    | <0.001  |
| Household income (£) (%)                    |                                      |            |            | 0.003   |        |                             |            |            | 0.432   |
| < 18,000*                                   | 24.0                                 | 20.1       | 19.0       |         |        | 21.8                        | 20.1       | 19.8       |         |
| 18,000 to 30,999                            | 24.0                                 | 24.0       | 24.6       |         |        | 23.7                        | 24.0       | 24.7       |         |
| 31,000 to 51,999                            | 21.1                                 | 24.2       | 22.9       |         |        | 22.5                        | 23.7       | 22.9       |         |
| 52,000 to 100,000                           | 15.5                                 | 16.2       | 16.8       |         |        | 16.5                        | 16.2       | 15.9       |         |
| > 100,000                                   | 2.8                                  | 3.9        | 4.1        |         |        | 4.1                         | 3.6        | 3.5        |         |
| Townsend deprivation index                  | -0.7±3.2                             | -1.0±3.1   | -1.2±3.0   | <0.001  |        | -0.7±3.2                    | -1.1±3.1   | -1.2±3.1   | <0.001  |
| Education/ n (%)                            |                                      |            |            | <0.001  |        |                             |            |            | <0.001  |
| College or University degree                | 29.3                                 | 32.9       | 40.8       |         |        | 31.2                        | 35.3       | 37.9       |         |
| Vocational qualifications                   | 13.9                                 | 13.6       | 13.6       |         |        | 14.4                        | 13.7       | 12.9       |         |
| Optional national exams at ages 17-18 years | 10.8                                 | 12.2       | 13.4       |         |        | 12.3                        | 11.8       | 12.8       |         |
| National exams at age 16 years              | 28.3                                 | 26.4       | 21.9       |         |        | 26.9                        | 25.1       | 23.8       |         |
| Others                                      | 16.6                                 | 13.8       | 9.6        |         |        | 14.2                        | 13.3       | 11.5       |         |
| Smoking (%)                                 |                                      |            |            | <0.001  |        |                             |            |            | <0.001  |
| Never                                       | 45.5                                 | 48.3       | 51.2       |         |        | 44.8                        | 48.6       | 52.5       |         |
| Previous                                    | 41.1                                 | 42.0       | 42.3       |         |        | 42.6                        | 42.0       | 41.1       |         |
| Current                                     | 13.0                                 | 9.0        | 6.2        |         |        | 12.1                        | 8.8        | 6.0        |         |

|                                              |           |           |           |        |              |              |              |        |
|----------------------------------------------|-----------|-----------|-----------|--------|--------------|--------------|--------------|--------|
| Alcohol drinking (%)                         |           |           |           | <0.001 |              |              |              | <0.001 |
| Never or special occasions only              | 45.2      | 41.1      | 37.7      |        | 39.3         | 39.2         | 44.2         |        |
| 1 to 3 times/month                           | 21.9      | 23.1      | 24.8      |        | 23.5         | 23.9         | 22.9         |        |
| 1 or 2 times/week                            | 16.2      | 17.6      | 20.3      |        | 18.3         | 18.0         | 18.3         |        |
| 3 or 4 times/week                            | 16.5      | 17.9      | 17.1      |        | 18.7         | 18.7         | 14.7         |        |
| History of hypertension (%)                  | 78.2      | 80.7      | 77.6      | 0.008  | 80.2         | 78.8         | 78.2         | 0.182  |
| History of high cholesterol (%)              | 62.9      | 65.8      | 63.7      | 0.064  | 65.2         | 63.3         | 64.7         | 0.330  |
| Family history of cardiovascular disease (%) | 60.8      | 60.6      | 62.1      | 0.455  | 59.9         | 61.8         | 61.9         | 0.264  |
| Aspirin use (%)                              | 34.0      | 36.9      | 35.6      | 0.110  | 35.8         | 36.3         | 35.2         | 0.709  |
| Lipid-lowering drug (%)                      | 63.7      | 66.2      | 64.2      |        | 65.9         | 63.9         | 65.0         | 0.311  |
| Glucose-lowering medication (%)              |           |           |           |        |              |              |              |        |
| Oral                                         | 49.8      | 51.1      | 46.9      | 0.005  | 51.5         | 49.4         | 47.2         | 0.008  |
| Insulin                                      | 16.7      | 17.9      | 17.8      | 0.134  | 17.0         | 17.1         | 18.7         | 0.173  |
| Vitamin supplementation (%)                  | 26.2      | 29.8      | 33.2      | <0.001 | 26.5         | 30.1         | 33.7         | <0.001 |
| Mineral supplementation (%)                  | 8.5       | 10.0      | 12.4      | <0.001 | 8.1          | 11.0         | 12.3         | <0.001 |
| Dietary components                           |           |           |           |        |              |              |              |        |
| Vegetable (servings/d)                       | 1.1±1.5   | 2.2±2.1   | 3.5±2.9   | <0.001 | 1.4±1.8      | 2.3±2.0      | 3.5±2.9      | <0.001 |
| Fruit (servings/d)                           | 1.5±1.4   | 2.4±1.9   | 3.4±2.1   | <0.001 | 1.6±1.5      | 2.5±1.8      | 3.5±2.1      | <0.001 |
| Nut, seeds (servings/d)                      | 0.03±0.17 | 0.1±0.4   | 0.3±0.5   | <0.001 | 0.3±0.5      | 0.5±0.7      | 0.8±0.8      | <0.001 |
| Legume (servings/d)                          | 0.1±0.4   | 0.4±0.5   | 0.6±0.7   | <0.001 |              |              |              |        |
| Whole grains (servings/d)                    | 0.8±1.0   | 1.3±1.4   | 1.8±1.5   | <0.001 | 0.9±1.1      | 1.3±1.3      | 2.0±1.5      | <0.001 |
| Red and processed meats (servings/d)         | 0.9±1.2   | 0.6±0.9   | 0.4±0.7   | <0.001 | 1.5±1.2      | 0.9±0.9      | 0.5±0.7      | <0.001 |
| Fish (servings/d)                            | 0.1±0.3   | 0.3±0.5   | 0.5±0.6   | <0.001 | —            | —            | —            |        |
| Ratio of monounsaturated to saturated fat    | 1.0±0.2   | 1.2±0.3   | 1.3±0.4   | <0.001 | —            | —            | —            |        |
| Alcohol (servings/d)                         | 16.0±26.9 | 15.1±23.3 | 13.1±18.2 | <0.001 | —            | —            | —            |        |
| Low-fat dairy (servings/d)                   | —         | —         | —         |        | 0.2±0.5      | 0.4±0.6      | 0.7±0.7      | <0.001 |
| Sugar-sweetened beverage (servings/d)        | —         | —         | —         |        | 0.5±0.8      | 0.3±0.6      | 0.1±0.4      | <0.001 |
| Sodium (mg)                                  | —         | —         | —         |        | 2381.2±946.6 | 1976.0±791.2 | 1842.0±801.1 | <0.001 |
| Diet score                                   | 1.6±0.6   | 3.5±0.5   | 5.8±0.9   | <0.001 | 19.3±2.5     | 24.5±1.1     | 29.5±2.3     | <0.001 |
| Diabetes duration (y)                        |           |           |           | <0.001 |              |              |              | 0.004  |
| <5                                           | 39.8      | 41.1      | 43.8      |        | 40.6         | 41.5         | 43.1         |        |
| 5-10                                         | 23.5      | 24.4      | 21.5      |        | 23.4         | 23.1         | 23.0         |        |
| ≥10                                          | 21.7      | 22.8      | 23.8      | □      | 23.0         | 21.9         | 23.7         |        |

AMED=alternate Mediterranean diet, DASH=dietary approaches to stop hypertension, BMI=body mass index, SBP=systolic blood pressure, DBP=diastolic blood pressure, MET=metabolic equivalent of task.

\*Data are either percentage or mean $\pm$ SD unless indicated otherwise.

**Table S6.** Multivariable Hazard Ratios (95% CIs) of healthy diet score and stroke subgroup

| □                             | Quintiles of healthy diet score |                  |                         |                         |                         | <i>P</i> <sub>trend</sub> |
|-------------------------------|---------------------------------|------------------|-------------------------|-------------------------|-------------------------|---------------------------|
|                               | Q1                              | Q2               | Q3                      | Q4                      | Q5                      |                           |
| N                             | 4489                            | 4500             | 4494                    | 4499                    | 4491                    |                           |
| <b>Ischemic stroke case</b>   | 162                             | 138              | 123                     | 128                     | 119                     |                           |
| Person-years                  | 53202.3                         | 53523.5          | 53364.1                 | 53709.5                 | 53986.8                 |                           |
| Adjustment for age and sex    | 1 (Ref.)                        | 0.80 (0.64-1.01) | <b>0.71 (0.56-0.90)</b> | <b>0.72 (0.57-0.90)</b> | <b>0.63 (0.50-0.81)</b> | <b>&lt; 0.001</b>         |
| Multivariable adjustment†     | 1 (Ref.)                        | 0.83 (0.66-1.04) | <b>0.77 (0.61-0.98)</b> | <b>0.78 (0.61-0.99)</b> | <b>0.71 (0.55-0.91)</b> | <b>0.008</b>              |
| <b>Hemorrhage stroke case</b> | 29                              | 43               | 32                      | 34                      | 26                      |                           |
| Person-years                  | 53812.0                         | 53915.4          | 53741.8                 | 54101.7                 | 54297.5                 |                           |
| Adjustment for age and sex    | 1 (Ref.)                        | 1.43 (0.89-2.29) | 1.06 (0.64-1.75)        | 1.09 (0.66-1.79)        | 0.81 (0.47-1.37)        | 0.202                     |
| Multivariable adjustment †    | 1 (Ref.)                        | 1.40 (0.87-2.25) | 1.04 (0.62-1.73)        | 1.04 (0.63-1.74)        | 0.80 (0.46-1.39)        | 0.195                     |

†The multivariate model was adjusted for age, sex, race, centers, BMI, household income, Townsend deprivation index, smoking, alcohol consumption, physical activity, history of hypertension, history of hyper cholesterol, family history of cardiovascular disease, family history of diabetes, vitamin supplement use, mineral supplement use, aspirin use, and diabetes duration.

**Table S7.** Multivariable Hazard Ratios (95% CIs) of healthy diet score and CVD incidence from sensitivity analyses

|                                                     | Quintiles of cardiovascular disease diet score |                  |                         |                          |                         | <i>P</i> <sub>trend</sub> |
|-----------------------------------------------------|------------------------------------------------|------------------|-------------------------|--------------------------|-------------------------|---------------------------|
|                                                     | Q1                                             | Q2               | Q3                      | Q4                       | Q5                      |                           |
| <b>Further adjusted for lipid-lowering drugs</b>    |                                                |                  |                         |                          |                         |                           |
| No. of participants                                 | 4489                                           | 4500             | 4494                    | 4499                     | 4491                    |                           |
| CVD cases                                           | 1079                                           | 1097             | 1041                    | 1020                     | 972                     |                           |
| Multivariable-adjusted HR (95% CI)†                 | 1 (Ref.)                                       | 0.99 (0.91-1.08) | 0.97 (0.89-1.06)        | 0.93 (0.85-1.02)         | <b>0.86 (0.79-0.95)</b> | <b>&lt;0.001</b>          |
| CHD cases                                           | 757                                            | 732              | 721                     | 688                      | 654                     |                           |
| Multivariable-adjusted HR (95% CI)†                 | 1 (Ref.)                                       | 0.95 (0.86-1.05) | 0.97 (0.87-1.07)        | <b>0.90 (0.81-0.997)</b> | <b>0.83 (0.75-0.93)</b> | <b>&lt;0.001</b>          |
| Stroke cases                                        | 211                                            | 188              | 160                     | 168                      | 154                     |                           |
| Multivariable-adjusted HR (95% CI)†                 | 1 (Ref.)                                       | 0.87 (0.71-1.06) | <b>0.77 (0.63-0.95)</b> | <b>0.79 (0.64-0.97)</b>  | <b>0.71 (0.57-0.88)</b> | <b>0.002</b>              |
| <b>Further adjusted for glucose-lowering drugs*</b> |                                                |                  |                         |                          |                         |                           |
| No. of participants                                 | 4489                                           | 4500             | 4494                    | 4499                     | 4491                    |                           |
| CVD cases                                           | 1079                                           | 1097             | 1041                    | 1020                     | 972                     |                           |
| Multivariable-adjusted HR (95% CI)†                 | 1 (Ref.)                                       | 0.99 (0.91-1.07) | 0.96 (0.88-1.05)        | 0.92 (0.84-1.01)         | <b>0.85 (0.78-0.93)</b> | <b>&lt;0.001</b>          |
| CHD cases                                           | 757                                            | 732              | 721                     | 688                      | 654                     |                           |
| Multivariable-adjusted HR (95% CI)†                 | 1 (Ref.)                                       | 0.94 (0.85-1.04) | 0.96 (0.86-1.06)        | <b>0.88 (0.79-0.98)</b>  | <b>0.82 (0.74-0.92)</b> | <b>&lt;0.001</b>          |
| Stroke cases                                        | 211                                            | 188              | 160                     | 168                      | 154                     |                           |
| Multivariable-adjusted HR (95% CI)†                 | 1 (Ref.)                                       | 0.86 (0.71-1.05) | <b>0.77 (0.62-0.94)</b> | <b>0.78 (0.63-0.96)</b>  | <b>0.70 (0.56-0.87)</b> | <b>0.001</b>              |
| <b>Further adjusted for sleeping pattern</b>        |                                                |                  |                         |                          |                         |                           |
| No. of participants                                 | 4489                                           | 4500             | 4494                    | 4499                     | 4491                    |                           |
| CVD cases                                           | 1079                                           | 1097             | 1041                    | 1020                     | 972                     |                           |
| Multivariable-adjusted HR (95% CI)†                 | 1 (Ref.)                                       | 1.00 (0.92-1.09) | 0.98 (0.90-1.07)        | 0.95 (0.87-1.03)         | <b>0.88 (0.80-0.96)</b> | <b>0.002</b>              |
| CHD cases                                           | 757                                            | 732              | 721                     | 688                      | 654                     |                           |
| Multivariable-adjusted HR (95% CI)†                 | 1 (Ref.)                                       | 0.96 (0.87-1.07) | 0.98 (0.88-1.09)        | 0.92 (0.82-1.02)         | <b>0.85 (0.76-0.95)</b> | <b>0.003</b>              |
| Stroke cases                                        | 211                                            | 188              | 160                     | 168                      | 154                     |                           |
| Multivariable-adjusted HR (95% CI)†                 | 1 (Ref.)                                       | 0.87 (0.72-1.07) | <b>0.78 (0.63-0.96)</b> | <b>0.79 (0.64-0.98)</b>  | <b>0.72 (0.58-0.89)</b> | <b>0.002</b>              |
| <b>Excluding incident CVD within 2 years</b>        |                                                |                  |                         |                          |                         |                           |
| No. of participants                                 | 4358                                           | 4359             | 4362                    | 4355                     | 4358                    |                           |
| CVD cases                                           | 936                                            | 958              | 911                     | 874                      | 849                     |                           |
| Multivariable-adjusted HR (95% CI)†                 | 1 (Ref.)                                       | 1.00 (0.92-1.10) | 0.98 (0.89-1.07)        | 0.92 (0.84-1.01)         | <b>0.87 (0.79-0.96)</b> | <b>&lt;0.001</b>          |
| CHD cases                                           | 641                                            | 627              | 616                     | 570                      | 561                     |                           |
| Multivariable-adjusted HR (95% CI)†                 | 1 (Ref.)                                       | 0.97 (0.86-1.08) | 0.97 (0.87-1.09)        | <b>0.87 (0.78-0.98)</b>  | <b>0.84 (0.75-0.95)</b> | <b>0.001</b>              |

|                                                           |          |                   |                         |                         |                         |                  |  |
|-----------------------------------------------------------|----------|-------------------|-------------------------|-------------------------|-------------------------|------------------|--|
| Stroke cases                                              | 176      | 162               | 135                     | 146                     | 132                     |                  |  |
| Multivariable-adjusted HR (95% CI)†                       | 1 (Ref.) | 0.90 (0.73-1.12)  | 0.79 (0.62-0.99)        | 0.83 (0.66-1.04)        | <b>0.74 (0.58-0.93)</b> | <b>0.010</b>     |  |
| <b>Excluding participants with missing covariate data</b> |          |                   |                         |                         |                         |                  |  |
| No. of participants                                       | 2555     | 2567              | 2559                    | 2563                    | 2559                    |                  |  |
| CVD cases                                                 | 654      | 595               | 589                     | 600                     | 543                     |                  |  |
| Multivariable-adjusted HR (95% CI)†                       | 1 (Ref.) | 0.90 (0.80-1.002) | 0.88 (0.79-0.99)        | 0.91 (0.81-1.02)        | <b>0.80 (0.71-0.90)</b> | <b>0.001</b>     |  |
| CHD cases                                                 | 440      | 408               | 414                     | 393                     | 373                     |                  |  |
| Multivariable-adjusted HR (95% CI)†                       | 1 (Ref.) | 0.93 (0.81-1.07)  | 0.93 (0.82-1.07)        | 0.89 (0.78-1.02)        | <b>0.83 (0.72-0.96)</b> | <b>0.012</b>     |  |
| Stroke cases                                              | 134      | 114               | 90                      | 93                      | 84                      |                  |  |
| Multivariable-adjusted HR (95% CI)†                       | 1 (Ref.) | 0.85 (0.66-1.10)  | <b>0.66 (0.50-0.87)</b> | <b>0.67 (0.51-0.88)</b> | <b>0.59 (0.45-0.79)</b> | <b>&lt;0.001</b> |  |
| <b>Excluding participants with type 1 diabetes</b>        |          |                   |                         |                         |                         |                  |  |
| No. of participants                                       | 4430     | 4429              | 4437                    | 4429                    | 4423                    |                  |  |
| CVD cases                                                 | 1063     | 1079              | 1024                    | 1004                    | 961                     |                  |  |
| Multivariable-adjusted HR (95% CI)†                       | 1 (Ref.) | 0.99 (0.91-1.08)  | 0.97 (0.89-1.06)        | 0.94 (0.86-1.02)        | <b>0.87 (0.79-0.95)</b> | <b>0.001</b>     |  |
| CHD cases                                                 | 746      | 715               | 711                     | 675                     | 649                     |                  |  |
| Multivariable-adjusted HR (95% CI)†                       | 1 (Ref.) | 0.95 (0.85-1.05)  | 0.97 (0.87-1.08)        | 0.90 (0.81-1.001)       | <b>0.84 (0.76-0.94)</b> | <b>0.002</b>     |  |
| Stroke cases                                              | 206      | 189               | 154                     | 166                     | 151                     |                  |  |
| Multivariable-adjusted HR (95% CI)†                       | 1 (Ref.) | 0.90 (0.74-1.10)  | <b>0.76 (0.62-0.95)</b> | <b>0.80 (0.65-0.99)</b> | <b>0.72 (0.57-0.89)</b> | <b>0.002</b>     |  |

\*Glucose-lowering drugs including oral and insulin.

CI = confidence interval; HR = hazard ratio.

†The multivariate model was adjusted for age, sex, race, centers, BMI, Townsend deprivation index, household income, smoking, alcohol consumption, physical activity, history of hypertension, history of hyper cholesterol, family history of cardiovascular disease, family history of diabetes, vitamin supplement use, mineral supplement use, aspirin use, healthy diet score, and diabetes duration.

**Table S8.** Multivariable Hazard Ratios (95% CIs) of AMED diet score and CVD incidence from sensitivity analyses

|                                                           | Tertiles of Mediterranean diet score |                         |                          | <i>P</i> <sub>trend</sub> |
|-----------------------------------------------------------|--------------------------------------|-------------------------|--------------------------|---------------------------|
|                                                           | T1                                   | T2                      | T3                       |                           |
| <b>Further adjusted for lipid-lowering drugs</b>          |                                      |                         |                          |                           |
| No. of participants                                       | 1841                                 | 3366                    | 2715                     |                           |
| CVD cases                                                 | 420                                  | 667                     | 498                      |                           |
| Multivariable-adjusted HR (95% CI)‡                       | 1 (Ref.)                             | <b>0.87 (0.77-0.99)</b> | <b>0.84 (0.73-0.96)</b>  | <b>0.011</b>              |
| <b>Further adjusted for glucose-lowering drugs*</b>       |                                      |                         |                          |                           |
| No. of participants                                       | 1841                                 | 3366                    | 2715                     |                           |
| CVD cases                                                 | 420                                  | 667                     | 498                      |                           |
| Multivariable-adjusted HR (95% CI)‡                       | 1 (Ref.)                             | <b>0.87 (0.77-0.98)</b> | <b>0.84 (0.73-0.96)</b>  | <b>0.012</b>              |
| <b>Further adjusted for sleeping pattern</b>              |                                      |                         |                          |                           |
| No. of participants                                       | 1841                                 | 3366                    | 2715                     |                           |
| CVD cases                                                 | 420                                  | 667                     | 498                      |                           |
| Multivariable-adjusted HR (95% CI)‡                       | 1 (Ref.)                             | <b>0.87 (0.77-0.98)</b> | <b>0.84 (0.73-0.96)</b>  | <b>0.013</b>              |
| <b>Excluding incident CVD within 2 years</b>              |                                      |                         |                          |                           |
| No. of participants                                       | 1784                                 | 3282                    | 2662                     |                           |
| CVD cases                                                 | 363                                  | 583                     | 445                      |                           |
| Multivariable-adjusted HR (95% CI)‡                       | 1 (Ref.)                             | 0.88 (0.77-1.004)       | <b>0.86 (0.75-0.996)</b> | 0.053                     |
| <b>Excluding participants with missing covariate data</b> |                                      |                         |                          |                           |
| No. of participants                                       | 2195                                 | 1128                    | 1786                     |                           |
| CVD cases                                                 | 483                                  | 234                     | 340                      |                           |
| Multivariable-adjusted HR (95% CI)‡                       | 1 (Ref.)                             | 0.94 (0.81-1.11)        | 0.88 (0.77-1.02)         | 0.088                     |
| <b>Excluding participants with type 1 diabetes</b>        |                                      |                         |                          |                           |
| No. of participants                                       | 1797                                 | 3304                    | 2666                     |                           |
| CVD cases                                                 | 409                                  | 656                     | 486                      |                           |
| Multivariable-adjusted HR (95% CI)‡                       | 1 (Ref.)                             | <b>0.87 (0.77-0.98)</b> | <b>0.83 (0.73-0.96)</b>  | <b>0.011</b>              |
| <b>Excluding participants with extreme energy intake†</b> |                                      |                         |                          |                           |
| No. of participants                                       | 1815                                 | 3327                    | 2668                     |                           |
| CVD cases                                                 | 413                                  | 658                     | 487                      |                           |
| Multivariable-adjusted HR (95% CI) ‡                      | 1 (Ref.)                             | <b>0.87 (0.77-0.99)</b> | <b>0.83 (0.73-0.96)</b>  | <b>0.011</b>              |

\*Glucose-lowering drugs including oral and insulin.

†Extreme energy intake was <800 or >4200 kcal/d for men and <600 or >3500 kcal/d for women.

CI = confidence interval; HR = hazard ratio.

‡The multivariate model was adjusted for age, sex, race, centers, BMI, Townsend deprivation index, household income, smoking, alcohol consumption, physical activity, history of hypertension, history of hyper cholesterol, family history of cardiovascular disease, family history of diabetes, vitamin supplement use, mineral supplement use, aspirin use, healthy diet score, and diabetes duration.

**Table S9.** Multivariable Hazard Ratios (95% CIs) of DASH diet score and CVD incidence from sensitivity analyses

|                                                           | Tertiles of DASH diet score |                  |                  | <i>P</i> <sub>trend</sub> |
|-----------------------------------------------------------|-----------------------------|------------------|------------------|---------------------------|
|                                                           | T1                          | T2               | T3               |                           |
| <b>Further adjusted for lipid-lowering drugs</b>          |                             |                  |                  |                           |
| No. of participants                                       | 2684                        | 2562             | 2676             |                           |
| CVD cases                                                 | 572                         | 519              | 494              |                           |
| Multivariable-adjusted HR (95% CI) ‡                      | 1 (Ref.)                    | 1.03 (0.91-1.16) | 0.96 (0.85-1.09) | 0.546                     |
| <b>Further adjusted for glucose-lowering drugs*</b>       |                             |                  |                  |                           |
| No. of participants                                       | 2684                        | 2562             | 2676             |                           |
| CVD cases                                                 | 572                         | 519              | 494              |                           |
| Multivariable-adjusted HR (95% CI) ‡                      | 1 (Ref.)                    | 1.03 (0.91-1.16) | 0.96 (0.85-1.09) | 0.561                     |
| <b>Further adjusted for sleeping pattern</b>              |                             |                  |                  |                           |
| No. of participants                                       | 2684                        | 2562             | 2676             |                           |
| CVD cases                                                 | 572                         | 519              | 494              |                           |
| Multivariable-adjusted HR (95% CI) ‡                      | 1 (Ref.)                    | 1.04 (0.92-1.17) | 0.97 (0.85-1.10) | 0.620                     |
| <b>Excluding incident CVD within 2 years</b>              |                             |                  |                  |                           |
| No. of participants                                       | 2602                        | 2502             | 2624             |                           |
| CVD cases                                                 | 490                         | 459              | 442              |                           |
| Multivariable-adjusted HR (95% CI) ‡                      | 1 (Ref.)                    | 1.07 (0.94-1.22) | 1.01 (0.88-1.16) | 0.849                     |
| <b>Excluding participants with missing covariate data</b> |                             |                  |                  |                           |
| No. of participants                                       | 1725                        | 1622             | 1762             |                           |
| CVD cases                                                 | 365                         | 357              | 335              |                           |
| Multivariable-adjusted HR (95% CI) ‡                      | 1 (Ref.)                    | 1.10 (0.95-1.28) | 0.97 (0.83-1.13) | 0.726                     |
| <b>Excluding participants with type 1 diabetes</b>        |                             |                  |                  |                           |
| No. of participants                                       | 2620                        | 2522             | 2625             |                           |
| CVD cases                                                 | 559                         | 511              | 481              |                           |
| Multivariable-adjusted HR (95% CI) ‡                      | 1 (Ref.)                    | 1.03 (0.91-1.16) | 0.95 (0.83-1.07) | 0.408                     |
| <b>Excluding participants with extreme energy intake†</b> |                             |                  |                  |                           |
| No. of participants                                       | 2652                        | 2525             | 2633             |                           |
| CVD cases                                                 | 565                         | 506              | 487              |                           |
| Multivariable-adjusted HR (95% CI) ‡                      | 1 (Ref.)                    | 1.02 (0.90-1.15) | 0.96 (0.85-1.09) | 0.583                     |

\*Glucose-lowering drugs including oral and insulin.

†Extreme energy intake was <800 or >4200 kcal/d for men and <600 or >3500 kcal/d for women.

CI = confidence interval; HR = hazard ratio.

‡The multivariate model was adjusted for age, sex, race, centers, BMI, Townsend deprivation index, household income, smoking, alcohol consumption, physical activity, history of hypertension, history of hyper cholesterol, family history of cardiovascular disease, family history of diabetes, vitamin supplement use, mineral supplement use, aspirin use, healthy diet score, and diabetes duration.
